# Supplementary material for: Chemical Characterization and Wound Healing Property of Jacaranda decurrens Cham. (Bignoniaceae): An Experimental Study Based on Molecular Mechanisms
Source: Hindawi journal article supplement (doi:10.1155/2020/4749712), 2020-01-01
Supplement: f1 [file 4749712.f1.pdf]

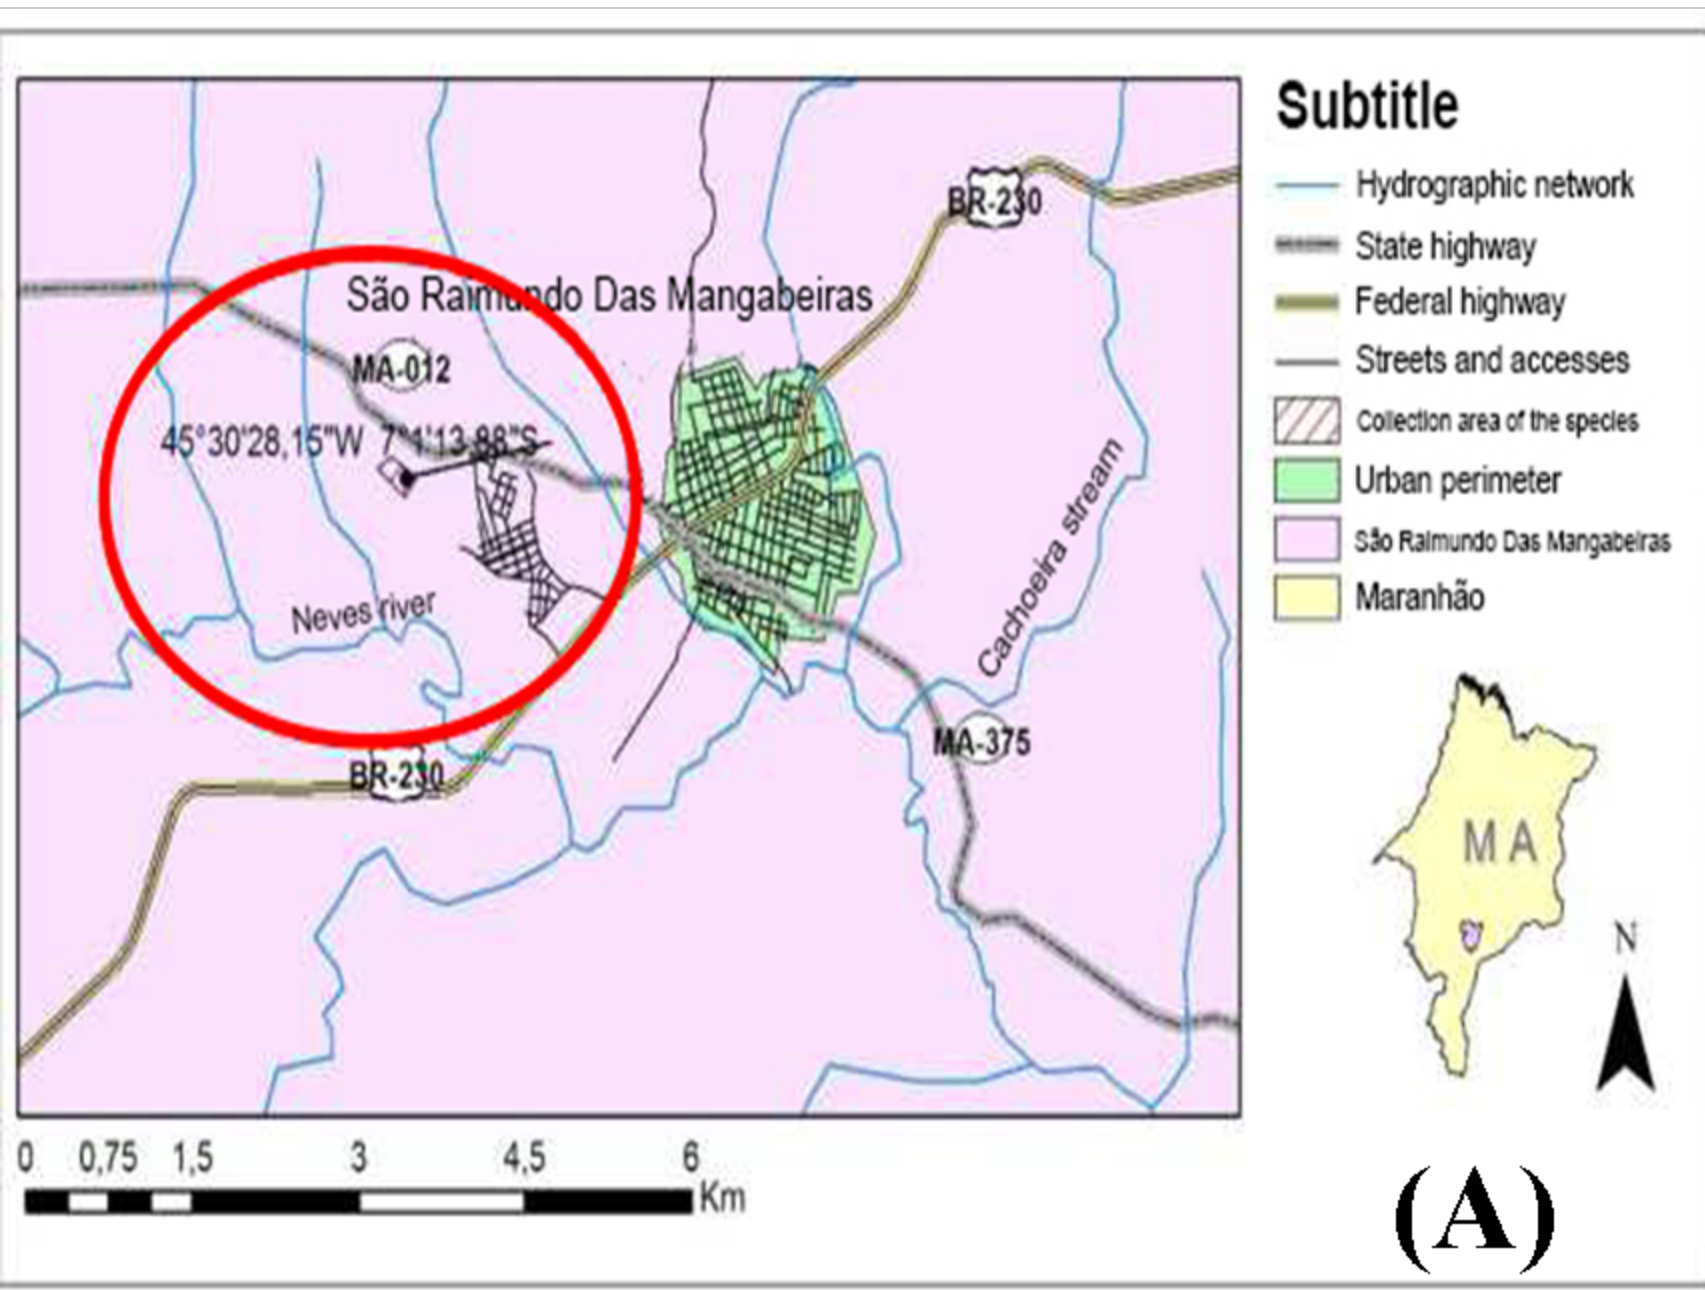

*J. decurrens* Cham.

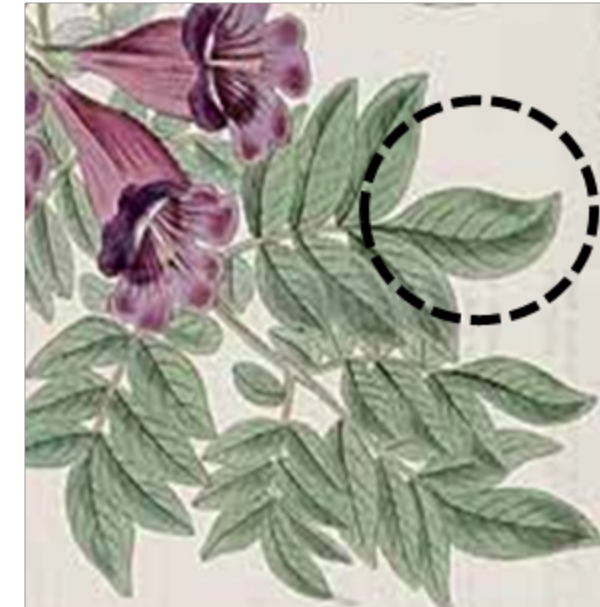

**(B)**

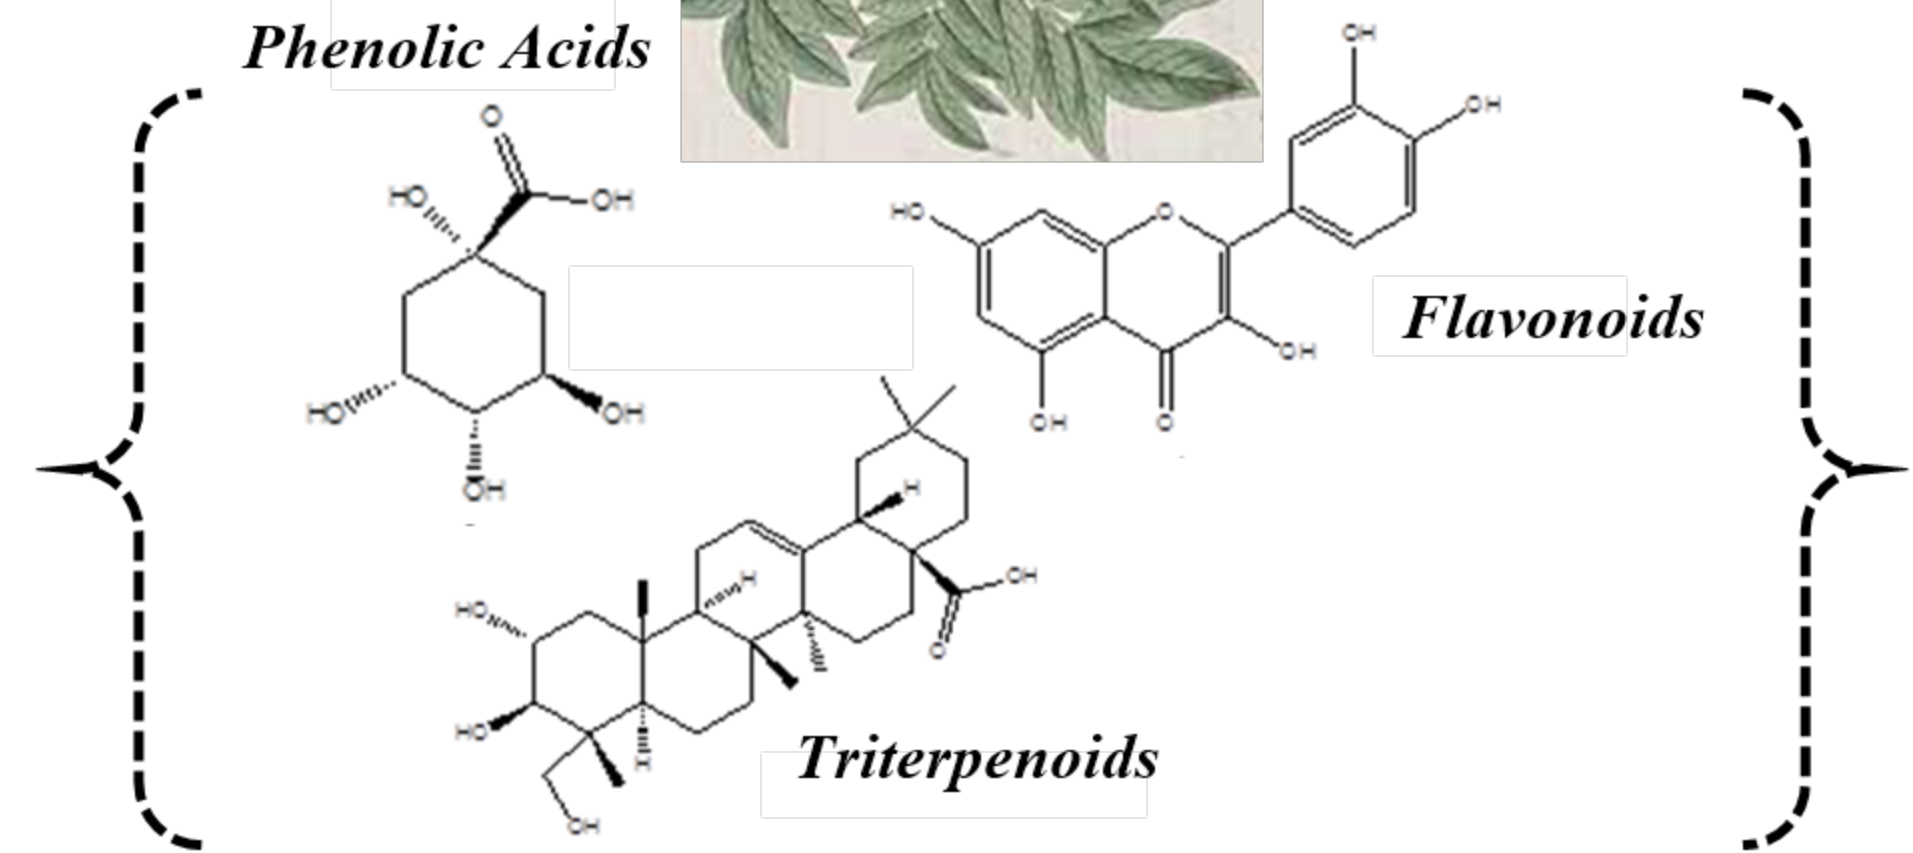

- Wound Healing**
- ✓ reduction of inflammation
  - ✓ fast injury closure
  - ✓ increased expression of tissue repair genes
  - ✓ sharp collagenization

**(C)**

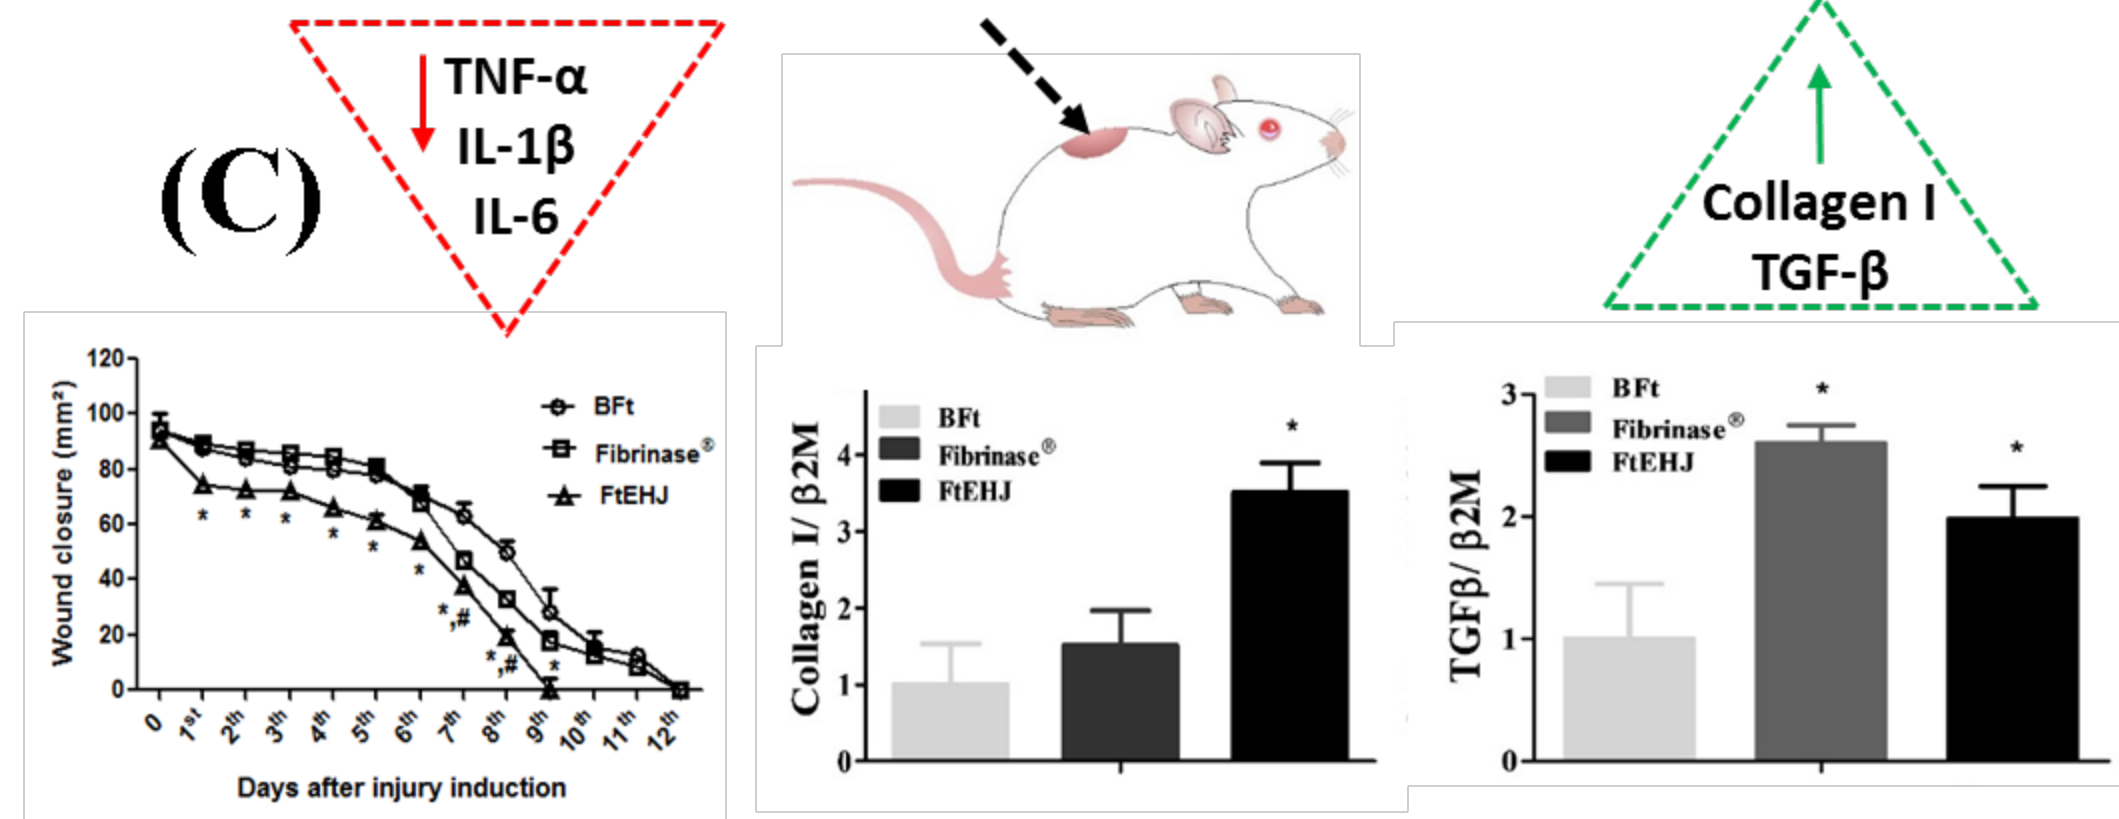

**Figure S1: (A) Place where *Jacaranda decurrens* Cham leaves were collected. (B) Group of secondary metabolites identified in the hydroalcoholic extract of the leaves of *J. decurrens* Cham. (C) *Jacaranda decurrens* Cham. ointment promoted a fast injury closure, decreased inflammation, increased expression of tissue repair genes, and sharp collagenization.**
